# Supplementary material for: Soil fungal networks are more sensitive to grazing exclusion than bacterial networks
Source: PeerJ. 2020 Sep 18;8:e9986. doi: 10.7717/peerj.9986 (PMC7505065; doi:10.7717/peerj.9986)
Supplement: Supplemental Information S2 [file peerj-08-9986-s002.xlsx]

## Sheet: 工作表1
	PB	PR	PD	SWC	TOC	TN	TP	Soil pH	BRR	BDR	BRB	BDB	FRR	FDR	FRB	FDB
grazing	33.87	8	1.7	0.89	1.95	0.23	0.08	8.47	1215	7.54	816	6.029	537	4.908	417	4.281
	34.74	5	1.29	0.97	1.79	0.2	0.09	8.44	1324	7.794	793	5.619	529	5.832	426	4.856
	33.43	5	1.57	0.84	1.84	0.27	0.08	8.92	1427	8.138	888	6.2	540	5.047	478	5.504
fencing	64.36	3	1.21	3.03	1.28	0.2	0.07	8.1	1413	8.218	1460	8.414	411	4.663	464	5.293
	64.6	3	1.19	2.08	1.4	0.2	0.08	8.11	1332	8.007	1437	8.258	369	4.309	445	5.269
	74.84	2	1.54	2.76	1.7	0.23	0.08	8.16	1328	7.974	1391	7.848	358	4.271	479	5.588
